# Supplementary material for: Potential Pathogenic Genes and Mechanism of Ankylosing Spondylitis: A Study Based on WGCNA and Bioinformatics Analysis
Source: Research Square preprint supplement (doi:10.21203/rs.3.rs-438711/v1), 2021-05-04
Supplement: Supplementary file 1 [file 67b588278e8a427cc2ba44d2.docx]

Supplement table 1. The miRNA targeting genes in Classical Module

| mRNA | miRNA |
| --- | --- |
| DPY30 | hsa-miR-22-3p hsa-miR-25-3p hsa-miR-32-5p hsa-miR-92a-3p hsa-miR-101-3p hsa-miR-139-5p hsa-miR-320a hsa-miR-363-3p hsa-miR-367-3p hsa-miR-493-3p hsa-miR-92b-3p hsa-miR-320b hsa-miR-320c hsa-miR-320d hsa-miR-4429 |
| RWDD1 | hsa-miR-223-3p hsa-miR-361-5p |
| CETN3 | hsa-miR-133a-3p hsa-miR-142-3p hsa-miR-133b |
| ITGB3BP | hsa-miR-22-3p hsa-miR-383-5p hsa-miR-501-3p hsa-miR-502-3p |
| HINT1 | hsa-miR-216b-5p |
| LSM5 | hsa-miR-204-5p hsa-miR-211-5p hsa-miR-330-3p hsa-miR-338-3p hsa-miR-433-3p |
| TMEM126B | hsa-miR-34a-5p hsa-miR-34c-5p hsa-miR-449a hsa-miR-449b-5p |
| NDUFA4 | hsa-miR-7-5p hsa-miR-205-5p hsa-miR-210-3p hsa-miR-1298-5p hsa-miR-147b |
